# Supplementary material for: Massively targeted evaluation of therapeutic CRISPR off-targets in cells
Source: PubMed Central journal article supplement (PMC9279339; doi:10.1038/s41467-022-31543-6), 2022-07-13
Supplement: 41467_2022_31543_MOESM3_ESM.pdf [file 41467_2022_31543_MOESM3_ESM.pdf]

**Title:** Supplementary Data 1.

**Description:** A noncomprehensive list of RGN offtarget detection methods.

**Title:** Supplementary Data 2.

**Description:** SURRO-seq LibA data.

**Title:** Supplementary Data 3.

**Description:** SURRO-seq LibB data.

**Title:** Supplementary Data 4.

**Description:** Deep sequencing of RGN-edited endogenous on-target and off-target sites in five human cell lines.

**Title:** Supplementary Data 5.

**Description:** Mismatch calculation and SURRO-seq LibC data.

**Title:** Supplementary Data 6.

**Description:** Primer sequences.

**Title:** Supplementary Data 7.

**Description:** List of NGS sequencing data depository
